# Supplementary material for: Solid-state photopolymerization of a photochromic hybrid based on Keggin tungstophosphates
Source: Royal Society of Chemistry journal article supplement (doi:10.1039/b718523e), 2008-01-01
Supplement: b718523e.pdf [file b718523e.pdf]

# Supplementary Information

## Solid-State Photopolymerization of a Photochromic Hybrid Based on Keggin Tungstophosphates

*Li-Zhi Zhang, Wen Gu, Xin Liu\*, Zhili Dong\*, and Bing Li*

Department of Chemistry, Nankai University, Tianjin 300071, People's Republic of China and  
School of Materials Science and Engineering, Nanyang Technological University, Singapore  
639798, Singapore

**Figure S1.** Photographs of (a) **1** and (b) **2**.

**Table S1.** Selected bond lengths (Å) and angles (°) for **1**.

**Table S2.** Selected bond lengths (Å) and angles (°) for **2**.

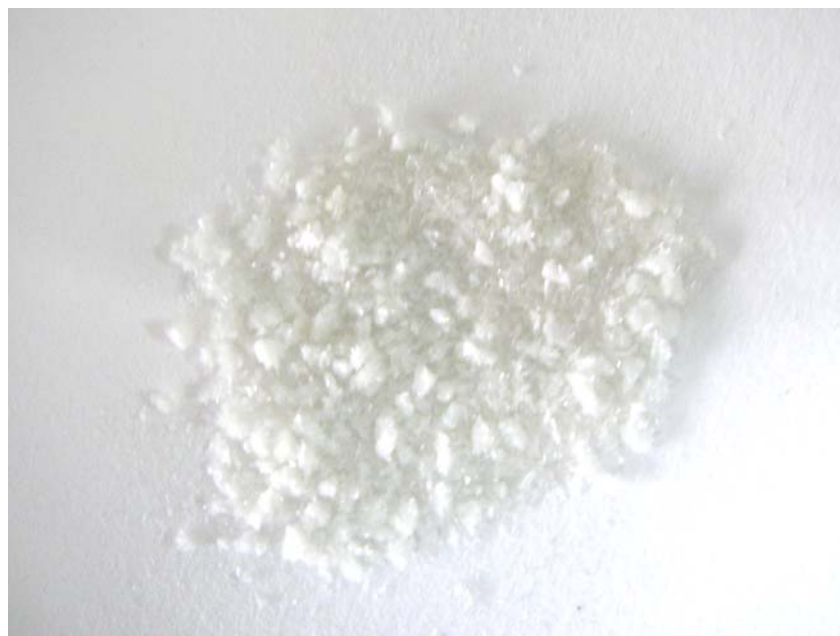

**(a)**

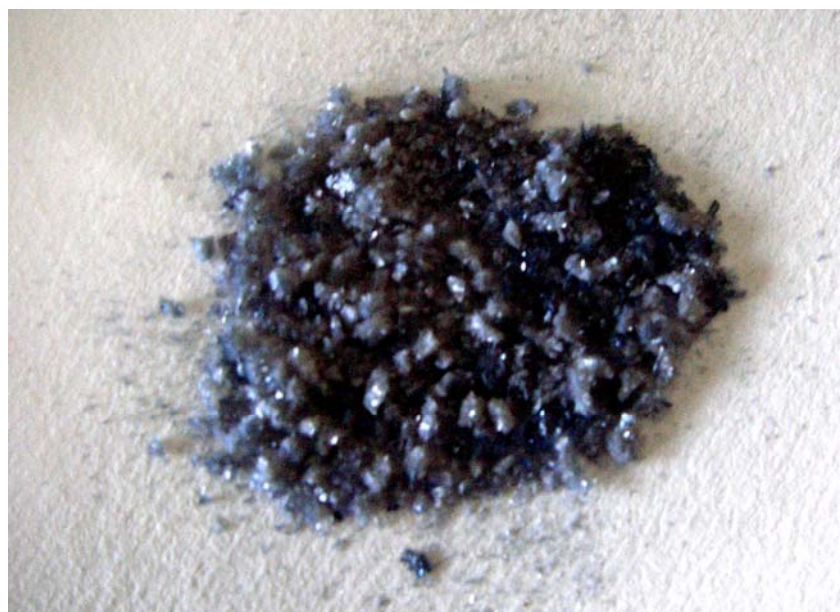

**(b)**

**Figure S1.** Photographs of (a) **1** and (b) **2**.

**Table S1.** Selected bond lengths (Å) and angles (°) for **1**.

|                   |           |                   |           |
|-------------------|-----------|-------------------|-----------|
| Gd(1)-O(25)       | 2.212(15) | O(23)-C(1)        | 1.20(3)   |
| Gd(1)-O(23)       | 2.243(17) | O(24)-C(6)        | 1.22(3)   |
| Gd(1)-O(24)       | 2.273(15) | O(25)-C(11)       | 1.20(3)   |
| Gd(1)-O(27)       | 2.304(19) | O(26)-C(16)       | 1.17(3)   |
| Gd(1)-O(28)       | 2.317(18) | O(27)-C(21)       | 1.13(3)   |
| Gd(1)-O(26)       | 2.347(19) | O(28)-C(26')      | 1.238(10) |
| Gd(1)-O(18)       | 2.514(16) | O(28)-C(26)       | 1.244(10) |
|                   |           |                   |           |
| O(25)-Gd(1)-O(23) | 171.9(8)  | O(24)-Gd(1)-O(18) | 143.9(6)  |
| O(25)-Gd(1)-O(24) | 91.9(8)   | O(27)-Gd(1)-O(18) | 70.3(6)   |
| O(23)-Gd(1)-O(24) | 95.9(8)   | O(28)-Gd(1)-O(18) | 141.3(6)  |
| O(25)-Gd(1)-O(27) | 92.1(7)   | O(26)-Gd(1)-O(18) | 68.8(6)   |
| O(23)-Gd(1)-O(27) | 88.0(7)   |                   |           |
| O(24)-Gd(1)-O(27) | 74.5(7)   |                   |           |
| O(25)-Gd(1)-O(28) | 94.0(8)   |                   |           |
| O(23)-Gd(1)-O(28) | 90.1(8)   |                   |           |
| O(24)-Gd(1)-O(28) | 74.3(7)   |                   |           |
| O(27)-Gd(1)-O(28) | 148.4(7)  |                   |           |
| O(25)-Gd(1)-O(26) | 88.4(7)   |                   |           |
| O(23)-Gd(1)-O(26) | 86.2(7)   |                   |           |
| O(24)-Gd(1)-O(26) | 146.8(7)  |                   |           |
| O(27)-Gd(1)-O(26) | 138.6(7)  |                   |           |
| O(28)-Gd(1)-O(26) | 72.6(7)   |                   |           |
| O(25)-Gd(1)-O(18) | 81.5(7)   |                   |           |
| O(23)-Gd(1)-O(18) | 90.9(7)   |                   |           |

Symmetry transformations used to generate equivalent atoms: #1 -x+1, -y+2, -z+1 #2 -x, -y+1, -z.

**Table S2.** Selected bond lengths (Å) and angles (°) for **2**.

|                       |           |                      |           |
|-----------------------|-----------|----------------------|-----------|
| Gd(1)-O(25)           | 2.255(13) | Gd(1)-O(6)#1         | 2.526(11) |
| Gd(1)-O(25)#1         | 2.255(13) | O(23)-C(1')          | 1.308(10) |
| Gd(1)-O(23)#1         | 2.299(12) | O(23)-C(1)           | 1.314(10) |
| Gd(1)-O(23)           | 2.299(12) | O(24)-C(6)           | 1.308(10) |
| Gd(1)-O(24)           | 2.357(13) | O(24)-C(6')          | 1.310(10) |
| Gd(1)-O(24)#1         | 2.357(13) | O(25)-C(11')         | 1.309(10) |
| Gd(1)-O(6)            | 2.526(11) | O(25)-C(11)          | 1.311(9)  |
|                       |           |                      |           |
| O(25)-Gd(1)-O(25)#1   | 102.7(9)  | O(23)#1-Gd(1)-O(6)   | 73.8(5)   |
| O(25)-Gd(1)-O(23)#1   | 95.2(6)   | O(23)-Gd(1)-O(6)     | 69.7(5)   |
| O(25)#1-Gd(1)-O(23)#1 | 145.4(5)  | O(24)-Gd(1)-O(6)     | 134.4(6)  |
| O(25)-Gd(1)-O(23)     | 145.4(5)  | O(24)#1-Gd(1)-O(6)   | 70.2(5)   |
| O(25)#1-Gd(1)-O(23)   | 95.2(6)   | O(25)-Gd(1)-O(6)#1   | 74.3(5)   |
| O(23)#1-Gd(1)-O(23)   | 86.1(9)   | O(25)#1-Gd(1)-O(6)#1 | 143.7(5)  |
| O(25)-Gd(1)-O(24)     | 75.5(8)   | O(23)#1-Gd(1)-O(6)#1 | 69.7(5)   |
| O(25)#1-Gd(1)-O(24)   | 74.0(6)   | O(23)-Gd(1)-O(6)#1   | 73.8(5)   |
| O(23)#1-Gd(1)-O(24)   | 139.8(5)  | O(24)-Gd(1)-O(6)#1   | 70.2(5)   |
| O(23)-Gd(1)-O(24)     | 81.5(7)   | O(24)#1-Gd(1)-O(6)#1 | 134.4(6)  |
| O(25)-Gd(1)-O(24)#1   | 74.0(6)   | O(6)-Gd(1)-O(6)#1    | 129.2(6)  |
| O(25)#1-Gd(1)-O(24)#1 | 75.5(8)   |                      |           |
| O(23)#1-Gd(1)-O(24)#1 | 81.5(7)   |                      |           |
| O(23)-Gd(1)-O(24)#1   | 139.8(5)  |                      |           |
| O(24)-Gd(1)-O(24)#1   | 130.2(9)  |                      |           |
| O(25)-Gd(1)-O(6)      | 143.7(5)  |                      |           |
| O(25)#1-Gd(1)-O(6)    | 74.3(5)   |                      |           |

Symmetry transformations used to generate equivalent atoms: #1 -x+2, y, -z+1/2 #2 -x+3/2, -y+1/2, -z.
